# Supplementary material for: NaV1.4 DI-S4 periodic paralysis mutation R222W enhances inactivation and promotes leak current to attenuate action potentials and depolarize muscle fibers
Source: PubMed Central journal article supplement (PMC6039468; doi:10.1038/s41598-018-28594-5), 2018-07-10
Supplement: 41598_2018_28594_MOESM1_ESM.pdf [file 41598_2018_28594_MOESM1_ESM.pdf]

Na<sub>v</sub>1.4 DI-S4 periodic paralysis mutation R222W enhances inactivation and promotes leak current to attenuate action potentials and depolarize muscle fibers

Landon Bayless-Edwards<sup>1</sup>, Vern Winston<sup>1</sup>, Frank Lehmann-Horn<sup>2,4</sup>, Paula Arinze<sup>1</sup>, James R Groome<sup>1\*</sup>, Karin Jurkat-Rott<sup>3</sup>

<sup>1</sup>Department of Biological Sciences, Idaho State University, 83209 Pocatello ID, USA

<sup>2</sup>Department of Applied Physiology, Ulm University, 89081 Ulm, Germany

<sup>3</sup>Department of Neuroanesthesiology, Clinic for Neurosurgery, Ulm University, Guenzburg, Germany

<sup>4</sup>Deceased

## Supplemental Information

### Action potential modeling

A two-compartment model of an action potential in a skeletal muscle fiber was constructed using methods similar to Cannon *et al.*<sup>39</sup> The change in membrane potential over time was defined as in supplementary equation S1:

$$(S1) \quad dV/dt = g_{Na}*(V_t - E_{Na}) + g_k*(V_t - E_k) + g_i*(V_t - E_i)$$

where  $g$  (conductance) is defined as  $g_{Na} = \bar{g}_{Na}m^3h$ ,  $g_k = \bar{g}_kn^4$ , and  $g_i$  is ionic leak conductance,  $\bar{g}$  is the maximum ionic conductance (Supplementary Table S2),  $V_t$  is the membrane potential in mV, and  $E$  is the equilibrium potential for each ion in mV. The  $h$  parameter was defined experimentally. A barrier model was constructed using inactivation kinetics by plotting the time constants of recovery, closed-state fast inactivation, and open-state fast inactivation, against voltage. Plots were fit with a Gaussian curve according to supplementary equation (S2):

$$(S2) \quad \tau(V_M) = 1 / (k_f + k_b)$$

where  $\tau (V_M)$  is the time constant of fast inactivation, and  $k_f$  and  $k_b$  are the rate equations for forward and backward reactions, respectively. Reaction rates were determined according to supplementary equations (S3) and (S4):

$$(S3) \quad k_f = A \exp\left(\frac{z\delta(V_M - V_{0.5})}{kT}\right)$$

$$(S4) \quad k_b = A \exp\left(-\frac{z(1-\delta)(V_M - V_{0.5})}{kT}\right)$$

where  $A$  is the half rate at  $V_0$ ,  $z$  is the apparent valency of the reaction,  $\delta$  is the fractional barrier distance,  $V_M$  is membrane potential and  $V_{0.5}$  is the midpoint in mV,  $T$  is the temperature in K, and  $k$  is the Boltzmann constant. These equations were used to define  $\alpha_h$  and  $\beta_h$ , rates of entry into and exit from the inactivated state in the Hodgkin-Huxley system of equations<sup>38</sup>. The  $h$  parameter of voltage-gated sodium channel inactivation in the Hodgkin-Huxley model was defined by  $\alpha_h$  and  $\beta_h$  using supplementary equation (S5):

$$(S5) \quad h = \alpha_h / (\alpha_h + \beta_h)$$

The sarcolemma and t-tubules comprise the two compartments of the model. Supplementary equation (S6) was used to calculate the ionic current flowing per unit area of t-tubule:

$$(S6) \quad I_{\text{ionic}} = \eta_{\text{Na}} * g_{\text{Na}} * (V_t - E_{\text{Na}}) + \eta_{\text{K}} * g_{\text{K}} * (V_t - E_{\text{K}}) + \eta_{\text{i}} * g_{\text{i}} * (V_t - E_{\text{i}})$$

where  $\eta$  is the ratio of t-tubule to surface channel densities. Values from Cannon *et al.*<sup>39</sup> were used to define sodium and potassium t-tubule to surface channel densities. We also modeled the accumulation of potassium in the t-tubules with supplementary equation (S7)<sup>39</sup>:

$$(S7) \quad d[K]_t/dt = (\eta_{\text{K}} * g_{\text{K}} * (V_t - E_{\text{K}}) + 0.15 * \eta_{\text{i}} * g_{\text{i}} * (V_t - E_{\text{i}})) / (F * \zeta) - ([K]_t - [K]_o) / \tau_{\text{K}}$$

where  $[K]_t$  is the concentration of potassium in the t-tubules,  $F$  is Faraday's constant,  $\zeta$  is the t-tubule surface area to volume ratio ( $10^{-6}$ ) and  $\tau_{\text{K}}$  is the time constant of diffusion of  $K^+$  between the t-tubular space and the extracellular space (350 ms). An increase in the concentration of t-

tubule potassium of approximately 0.2 mM was observed for native fibers (similar to Cannon *et al.*<sup>39</sup>), whereas an increase of approximately 0.1 mM was found in fibers containing R222W channels (Supplementary Fig. S1). This difference may be a consequence of action potential attenuation.

**Supplementary Table S1: Gating parameters used in action potential model.**

| Parameter                            | Control | R222W | Citation   |
|--------------------------------------|---------|-------|------------|
| $\bar{\alpha}_m$ (ms <sup>-1</sup> ) | 1       | 1     | [40]       |
| $\bar{\beta}_m$ (ms <sup>-1</sup> )  | 2       | 2     | [40]       |
| $\bar{V}_m$ (mV)                     | -30.5   | -30.5 | This paper |
| $K_{\alpha m}$ (mV)                  | 10      | 10    | [39]       |
| $K_{\beta m}$ (mV)                   | 13      | 13    | This paper |
| $\bar{\alpha}_n$ (ms <sup>-1</sup> ) | 7       | 7     | [39]       |
| $\bar{\beta}_n$ (ms <sup>-1</sup> )  | 40      | 40    | [39]       |
| $\bar{V}_n$ (mV)                     | -40     | -40   | [39]       |
| $K_{\alpha n}$ (mV)                  | 0.01    | 0.013 | [39]       |
| $K_{\beta n}$ (mV)                   | 0.07    | 0.07  | [39]       |
| $\bar{V}_h$ (mV)                     | -50.9   | -80.9 | This paper |
| $g_i$ (mS/cm <sup>2</sup> )          | 0.75    | 0.75  | [39]       |
| $\bar{g}_{Na}$ (mS/cm <sup>2</sup> ) | 150     | 150   | [39]       |
| $\bar{g}_K$ (mS/cm <sup>2</sup> )    | 21.6    | 21.6  | [39]       |
| Resting potential (P <sub>1</sub> )  | -80.0   | -80.0 | This paper |

**Supplementary Table S2: Values used in k<sub>F</sub> and k<sub>B</sub> calculations.**

| Parameter | Control | R222W |
|-----------|---------|-------|
| A         | 0.019   | 0.007 |
| z         | 4.54    | 4.01  |
| δ         | 0.50    | 0.35  |

|           |       |       |
|-----------|-------|-------|
| $V_{1/2}$ | -55.1 | -80.6 |
| $kT$      | 25.3  | 25.3  |
| $\chi^2$  | 24.5  | 53.1  |

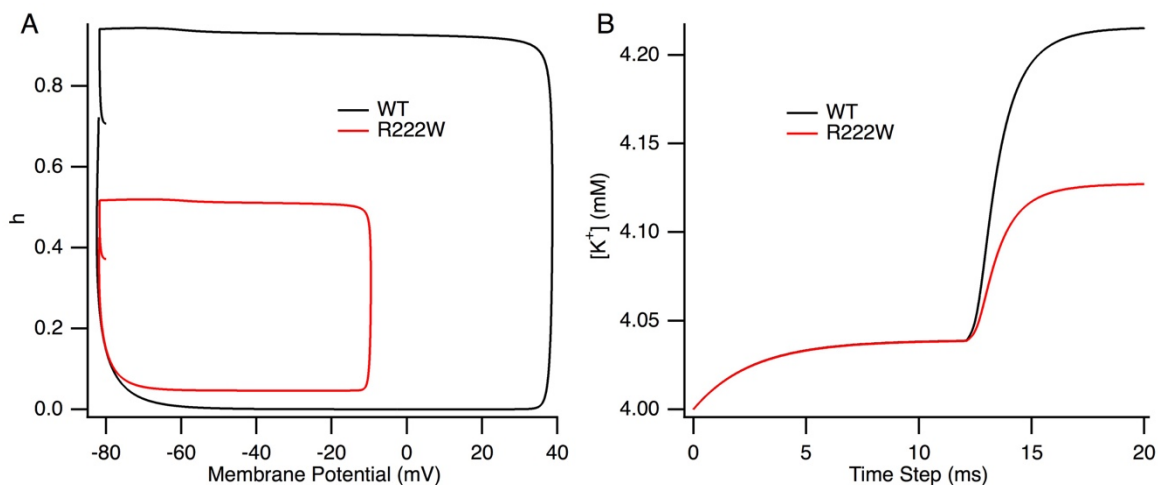

**Supplementary Figure S1: Additional parameters modeled in action potential simulations.**

A phase diagram of the  $h$ -gate parameter, or the inverse probability of inactivation, is shown in (A). The  $h$ -gate parameter from the R222W fibers shows a higher inactivation probability, consistent with electrophysiological results. Potassium accumulation in the t-tubules is shown in (B). There is less potassium accumulation after one action potential in R222W fibers compared to wild type.

**Supplementary Table S3: Parameters measured in molecular dynamics simulations.**

|      | VdW (kcal / mol) |                 | Electrostatic (kcal/mol) |                | Distance (Å)  |               |
|------|------------------|-----------------|--------------------------|----------------|---------------|---------------|
|      | R222             | W222            | R222                     | W222           | R222          | W222          |
| Y168 | $-3.1 \pm 0.3$   | $-1.9 \pm 0.2$  | $-0.8 \pm 1.3$           | $2.1 \pm 1.5$  | $4.3 \pm 0.2$ | $6.8 \pm 0.4$ |
| E171 | $4.1 \pm 2.4$    | $-0.1 \pm 0.03$ | $-99.6 \pm 7.9$          | $-0.5 \pm 0.5$ | $6.8 \pm 0.6$ | $9.9 \pm 0.3$ |
| D197 | $-0.03 \pm 0.01$ | $-1.0 \pm 0.4$  | $0.1 \pm 0.1$            | $1.2 \pm 0.7$  | $9.2 \pm 1.2$ | $7.2 \pm 0.4$ |
